# Supplementary material for: Psychotic Experiences and Overhasty Inferences Are Related to Maladaptive Learning
Source: PubMed Central journal article supplement (PMC5249047; doi:10.1371/journal.pcbi.1005328), 2017-01-20
Supplement: pcbi.1005328.s001.pdf [file pcbi.1005328.s001.pdf]

## Supplementary Material

Proof that the belief in the non-linear model is bounded between zero and one.

The belief update of our model is defined as follows

$$b_i = f(b_{i-1}, o_i) := b_{i-1} \pm \frac{\alpha}{\zeta + \frac{1}{|b_{i-1} - o_i|}},$$

with  $0 \leq \alpha \leq 1$ ,  $0 \leq \zeta$ ,  $0 \leq b_{i-1} \leq 1$  and  $o_i = 0, 1$ . Furthermore we define  $f(x, x) = x$ .

We want to show that our model does not produce overshooting beliefs, thus, the belief  $b_i$  should be confined to values between zero and one. This means, that  $f$  must map the unit interval  $I = [0, 1]$  into itself or

$$f(I, o) \subset I, \quad o \in \{0, 1\},$$

By definition of  $f$  we need to check  $f(I, 1) \leq 1$ , that is

$$x + \frac{\alpha}{\zeta + \frac{1}{1-x}} \leq 1, \quad x \in [0, 1),$$

We set  $y = 1 - x$  and obtain after multiplication with the denominator the following inequality

$$\alpha \leq y\zeta + 1. \tag{1}$$

Because  $\alpha \leq 1$  and  $0 \leq \zeta$  inequality (1) is satisfied if  $0 \leq y$ . This is true since  $x < 1$ .

The proof of  $0 \leq f(I, 0)$  is similar.

$$0 \leq x - \frac{\alpha}{\zeta + \frac{1}{x}}, \quad 0 < x \leq 1,$$

Setting  $y = x$  yields inequality (1).
